# Supplementary material for: Content of Capsaicinoids and Capsiate in “Filius” Pepper Varieties as Affected by Ripening
Source: MDPI journal article supplement (doi:10.3390/plants9091222), 2020-09-17
Supplement: s1 [file s1]

## SUPPLEMENTARY MATERIAL

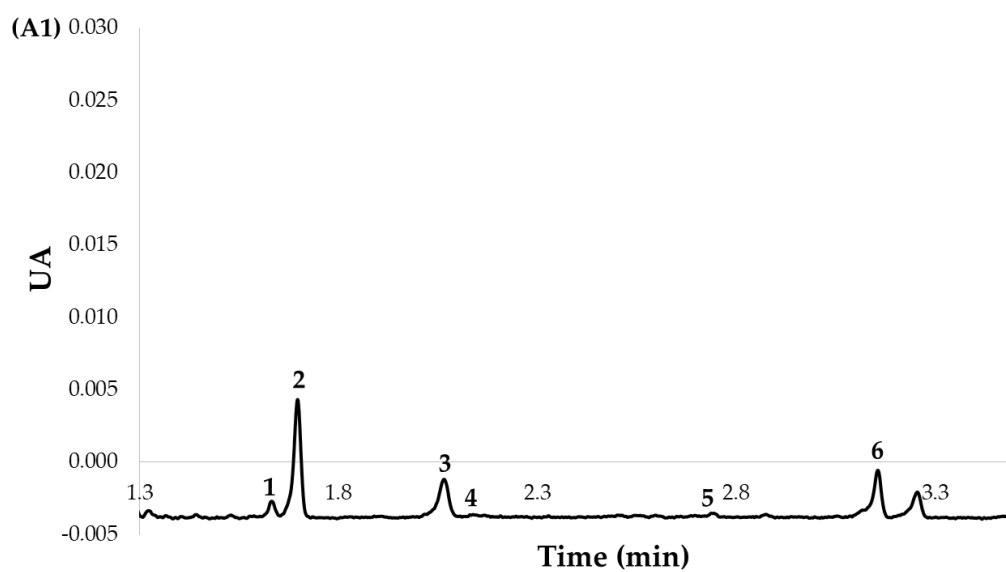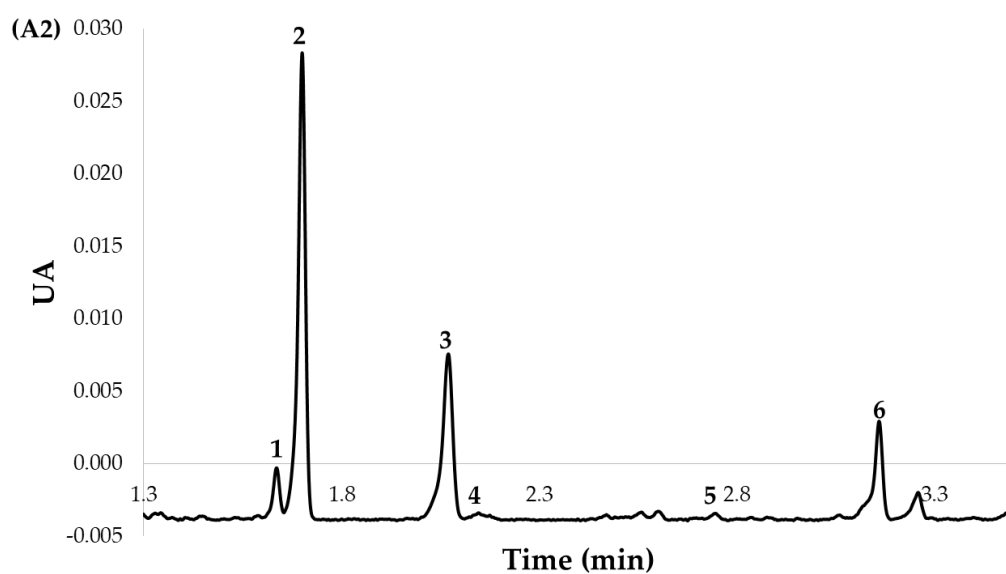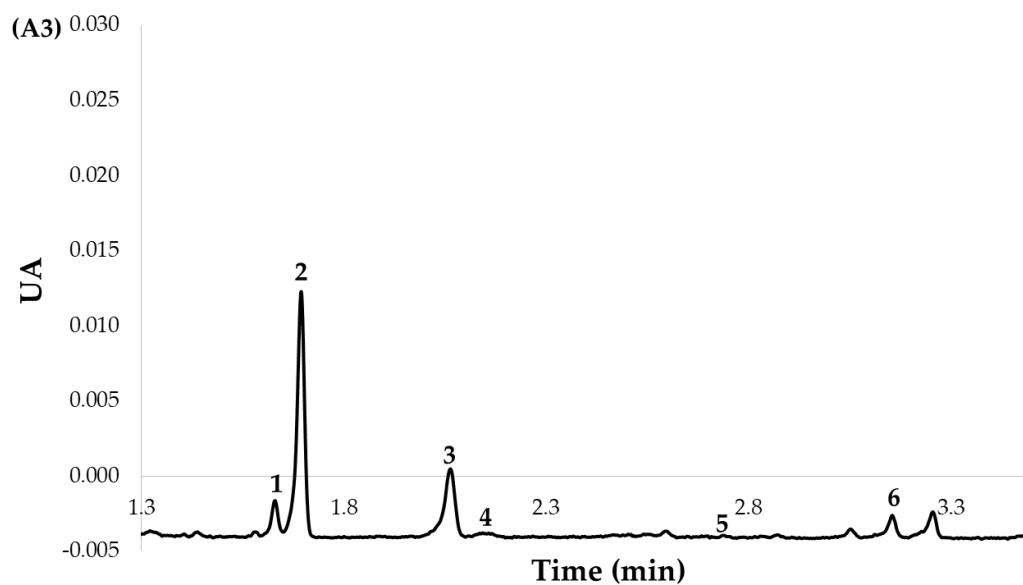

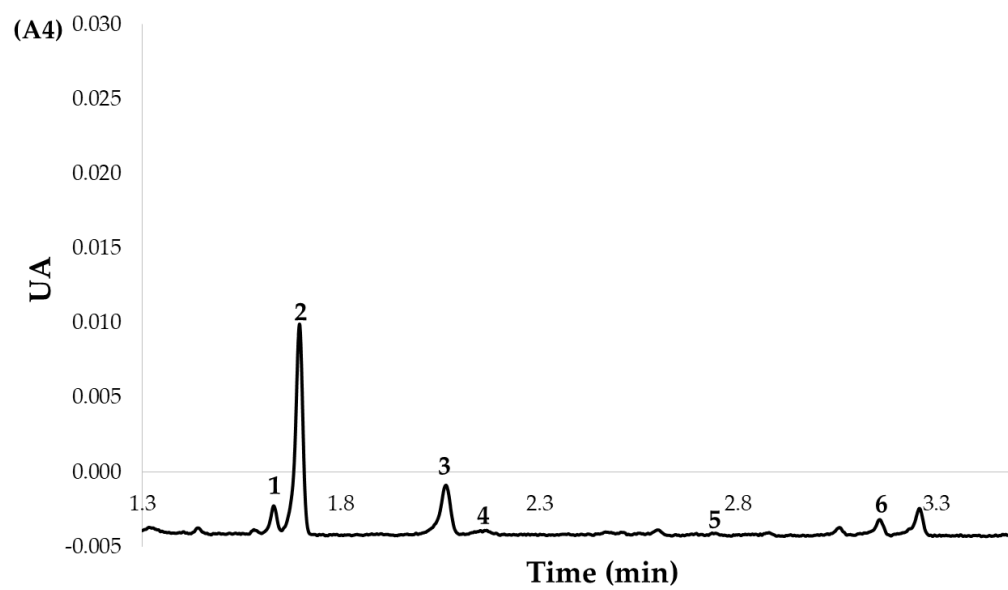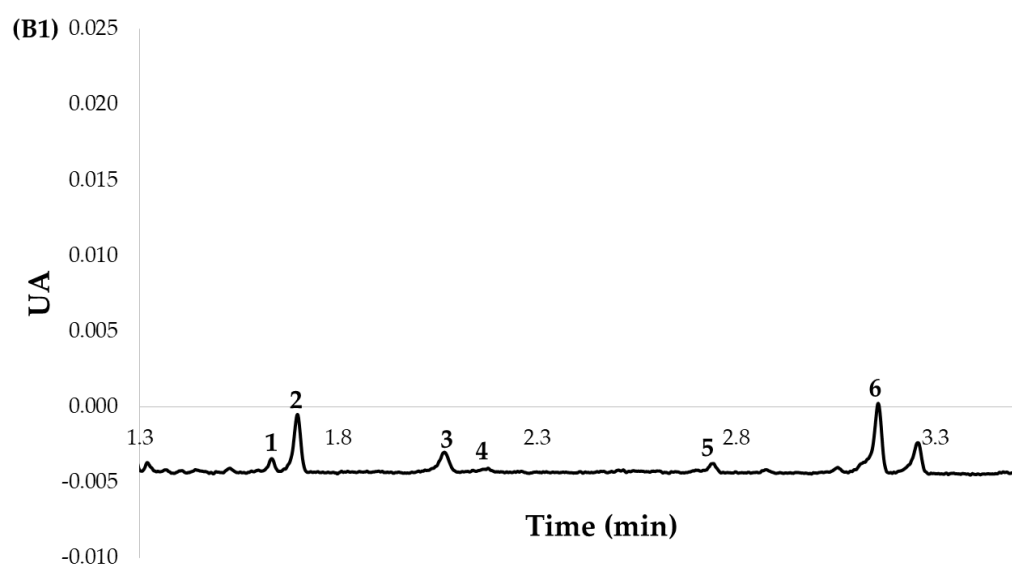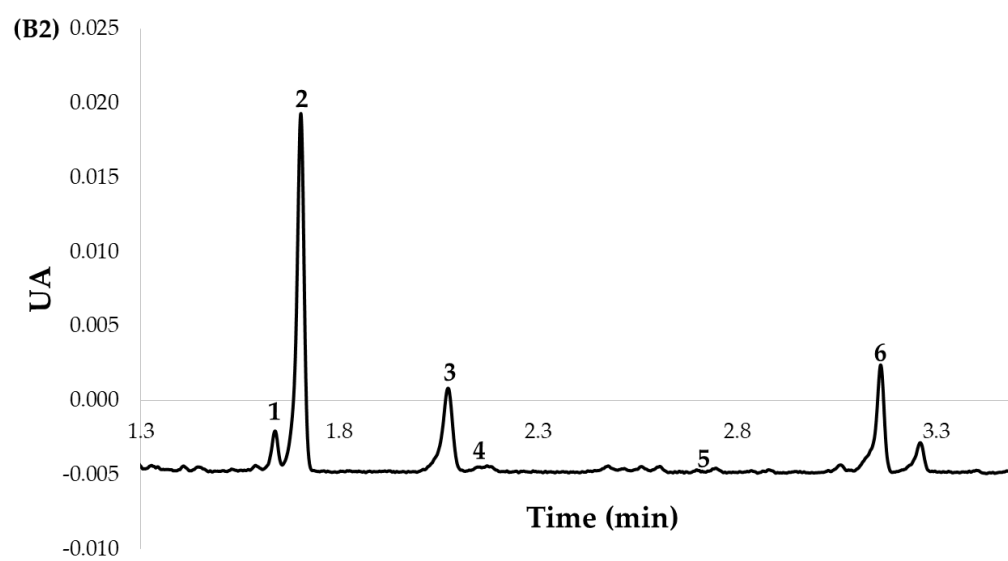

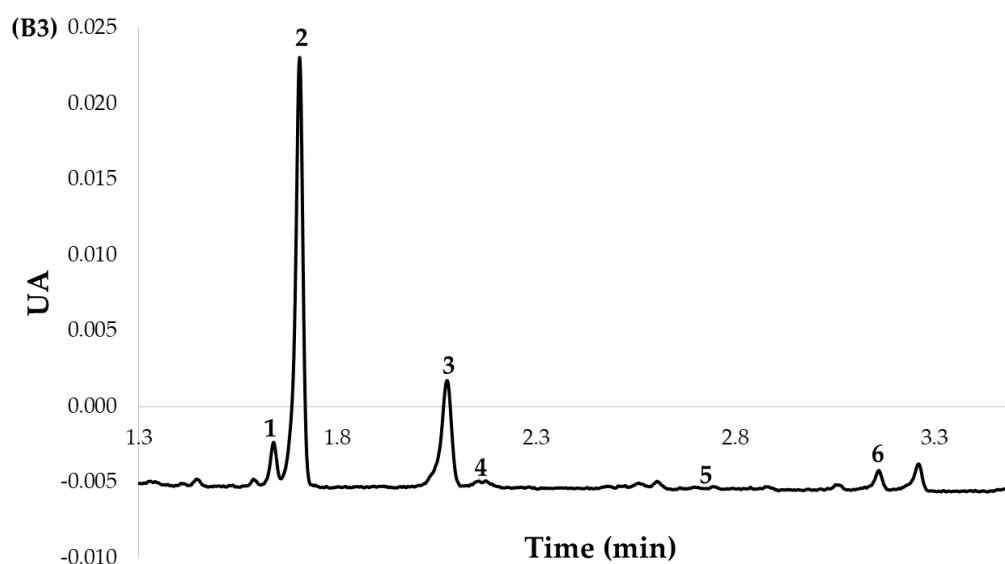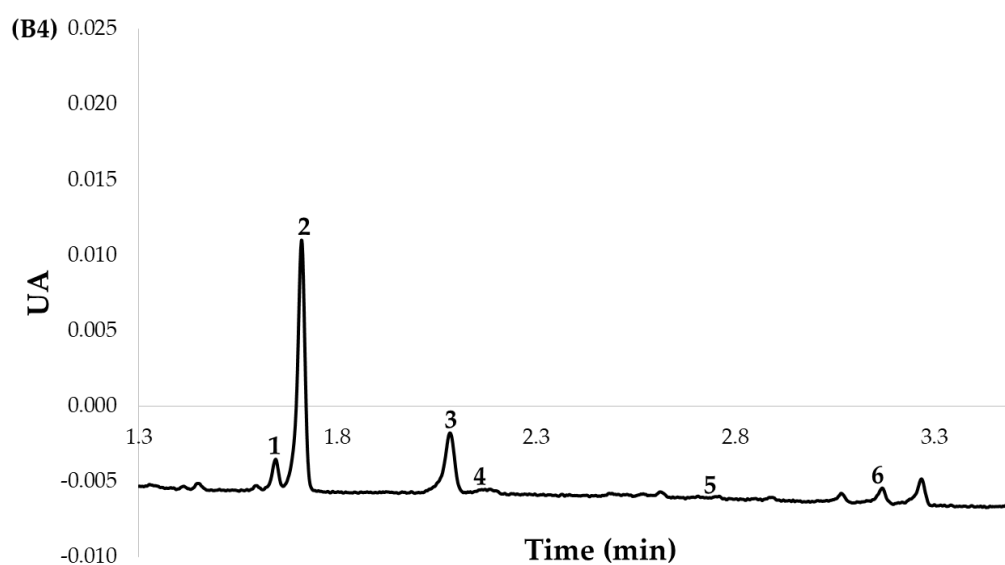

**Figure S1.** Representative chromatograms for the two varieties of pepper studied ((A) 'Filius Blue'; (B) 'Filius Green') obtained by UHPLC-PDA (280 nm) at (1) 13 dpa; (2) 34 dpa; (3) 55 dpa; (4) 76 dpa. The identified compounds were: (1) Nor-dihydrocapsaicin (n-DHC); (2) Capsaicin (C); (3) Dihydrocapsaicin (DHC); (4) Homo-capsaicin (h-C); (5) Homo-dihydrocapsaicin (h-DHC); (6) Capsiate (CTE).
